1 **A Deep Learning Approach to Estimate Collagenous Tissue**  
2 **Nonlinear Anisotropic Stress-Strain Responses from**  
3 **Microscopy Images**

4  
5 *Liang Liang, Minliang Liu and Wei Sun*

6  
7 *Tissue Mechanics Laboratory*

8 *The Wallace H. Coulter Department of Biomedical Engineering*  
9 *Georgia Institute of Technology and Emory University, Atlanta, GA*

10  
11  
12 Submitted to

13 **Biorxiv**

14 *6/22/2017*

15  
16  
17 For correspondence:

18 Wei Sun, Ph.D.

19 The Wallace H. Coulter Department of Biomedical Engineering

20 Georgia Institute of Technology and Emory University

21 Technology Enterprise Park, Room 206

22 387 Technology Circle, Atlanta, GA 30313-2412

23 Tel:(404) 385-1245; Email: [wei.sun@bme.gatech.edu](mailto:wei.sun@bme.gatech.edu)

24

25 **ABSTRACT**

26           Biological collagenous tissues comprised of networks of collagen fibers are suitable for a  
27 broad spectrum of medical applications owing to their attractive mechanical properties. In this  
28 study, we developed a noninvasive approach to estimate collagenous tissue elastic properties  
29 directly from microscopy images using Machine Learning (ML) techniques. Glutaraldehyde-  
30 treated bovine pericardium (GLBP) tissue, widely used in the fabrication of bioprosthetic heart  
31 valves and vascular patches, was chosen as a representative collagenous tissue. A Deep Learning  
32 model was designed and trained to process second harmonic generation (SHG) images of collagen  
33 networks in GLBP tissue samples, and directly predict the tissue elastic mechanical properties.  
34 The trained model is capable of identifying the overall tissue stiffness with a classification  
35 accuracy of 84%, and predicting the nonlinear anisotropic stress-strain curves with average  
36 regression errors of 0.021 and 0.031. Thus, this study demonstrates the feasibility and great  
37 potential of using the Deep Learning approach for fast and noninvasive assessment of collagenous  
38 tissue elastic properties from microstructural images.

39 **Keywords:** *Deep Learning, convolutional neural network, elastic property, collagenous tissue*

40

## 41 **1. INTRODUCTION**

42 Biological collagenous tissues are comprised of networks of collagen fibers embedded in  
43 a ground substance [1, 2], which provide pliability and strength important for many normal  
44 physiological functions. The attractive biological and mechanical properties [3] also make  
45 collagenous tissues, mostly derived from animals as xenografts, suitable for a broad spectrum of  
46 medical applications such as bioprosthetic heart valve (BHV) [4, 5], cardiovascular grafting/patch  
47 [6, 7], tendon [8] and hernia [9] repair. However, due to the heterogeneity and inherent variability  
48 of biological tissues, the mechanical properties of collagenous tissues obtained at different  
49 locations even within the same individual (regardless whether animal or human) may differ, and  
50 may impact tissue-derived device function.

51 Many studies [10-16] have shown that the microstructure of soft tissues, particularly the  
52 collagen fiber network structure, is the key determinant of the tissue elastic properties at the  
53 macroscopic level. Advanced microscopy imaging techniques, such as second harmonic  
54 generation (SHG) imaging, has enabled noninvasive visualization of soft tissue collagen networks  
55 at the microstructural level. The elastic properties of collagenous tissues are traditionally obtained  
56 through destructive mechanical testing of harvested tissue samples (Figure 1). Ideally, the  
57 nonlinear anisotropic elastic properties of collagenous tissues could be directly estimated from  
58 noninvasive images (e.g. SHG images) of the tissue microstructure, such that xenografts could be  
59 carefully selected based on their mechanical properties and optimal, more predictable, tissue-  
60 derived device function could be ensured.

61 Recently, Deep Learning [17], a branch of Machine Learning utilizing deep neural  
62 networks, has garnered enormous attention in the field of artificial intelligence. A special type of  
63 neural network, namely the convolutional neural network (CNN) [17-19], has become the state-

64 of-the-art approach for computer vision and image analysis applications (e.g. face recognition),  
65 reaching, and even surpassing, human performance in some cases [20-23]. CNN provides an end-  
66 to-end solution from input image to output target value by automatically extracting image features,  
67 thus eliminating the need for hand-crafted image features.

68 In this study, we developed, to our best knowledge, the first Deep Learning approach to  
69 estimate the elastic properties of collagenous tissues from SHG images (Figure 1). Glutaraldehyde-  
70 treated bovine pericardium (GLBP) tissue, widely used in the fabrication of BHVs [5] and vascular  
71 patches, was chosen as a representative collagenous tissue. A multi-layer CNN was designed and  
72 trained on a dataset of SHG images and corresponding mechanical testing results (i.e., equi-biaxial  
73 stress-strain curves). The trained CNN can automatically extract features from input SHG images  
74 of GLBP tissues and predict the nonlinear anisotropic elastic properties (Figure 1).

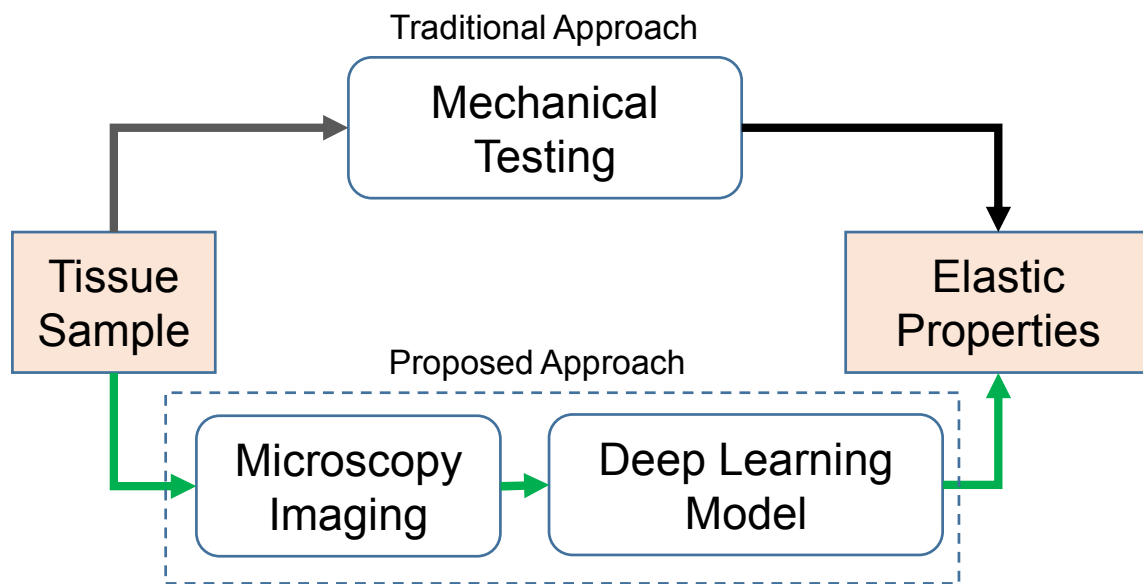

75  
76 Figure 1. Two approaches to obtain the elastic properties of a tissue sample: 1) the  
77 traditional approach utilizing mechanical testing of a physical test sample and 2) noninvasive  
78 microscopy imaging coupled with a trained Deep Learning model.

## 79 **2. METHODS**

80

### 81 **2.1 Tissue preparation and mechanical testing**

82

83 The GLBP tissue samples used in this study were collected and mechanically tested

84 through previous work by our group aimed at evaluating transcatheter heart valve biomaterials

85 [24]. The tissue preparation and mechanical testing protocols are well documented in the published

86 works [25-27]. Briefly, testing samples were cut into a  $20 \times 20$  mm<sup>2</sup> square, and four graphite

87 markers delimiting a square approximately  $2 \times 2$  mm<sup>2</sup> in size were glued to the central region of

88 each sample for optical strain measurements. Samples were then mounted in a trampoline fashion

89 to a planar biaxial tester in aqueous 0.9% NaCl solution at 37 °C. A stress-controlled test protocol

90 [25] was utilized to obtain the biaxial stress-strain response curves of each testing sample. In this

91 study, 48 GLBP tissue samples were tested in total.

### 92 **2.2 Tissue imaging**

93 Upon completion of biaxial mechanical testing, the tissue samples were imaged using the

94 SHG technique at the unloaded state. We utilized a Zeiss 710 NLO inverted confocal microscope

95 (Carl Zeiss Microscopy, LLC, Thornwood, NY, USA), equipped with a mode-locked Ti:Sapphire

96 Chameleon Ultra laser (Coherent Inc., Santa Clara, CA), a non-descanned detector (NDD), and a

97 Plan-Apochromat 40x oil immersion objective. The laser was set to 800 nm and emission was

98 filtered from 380–430 nm. Samples were kept hydrated with saline solution during imaging to

99 prevent drying artifacts and covered with #1.5 coverslips. Samples were imaged inside the area

100 delimited by the graphite markers, and 2D image slices were collected in the thickness direction

101 from the smooth side of each sample. A 2D slice has  $512 \times 512$  pixels to  $1024 \times 1024$  pixels, and for

102 each sample the number of slices was varied to cover the thickness. In total, we obtained 3D SHG

103 images (size from  $512 \times 512 \times N$  to  $1024 \times 1024 \times N$ ) of 48 tissue samples from different animal

104 subjects, and the corresponding mechanical testing data. Representative SHG images of a GLBP  
105 sample are shown in Figure 2, with a total of 18 slices ( $N=18$ ) through the thickness. It is evident  
106 from Figure 2 that the image patterns change very slowly through the GLBP tissue thickness.

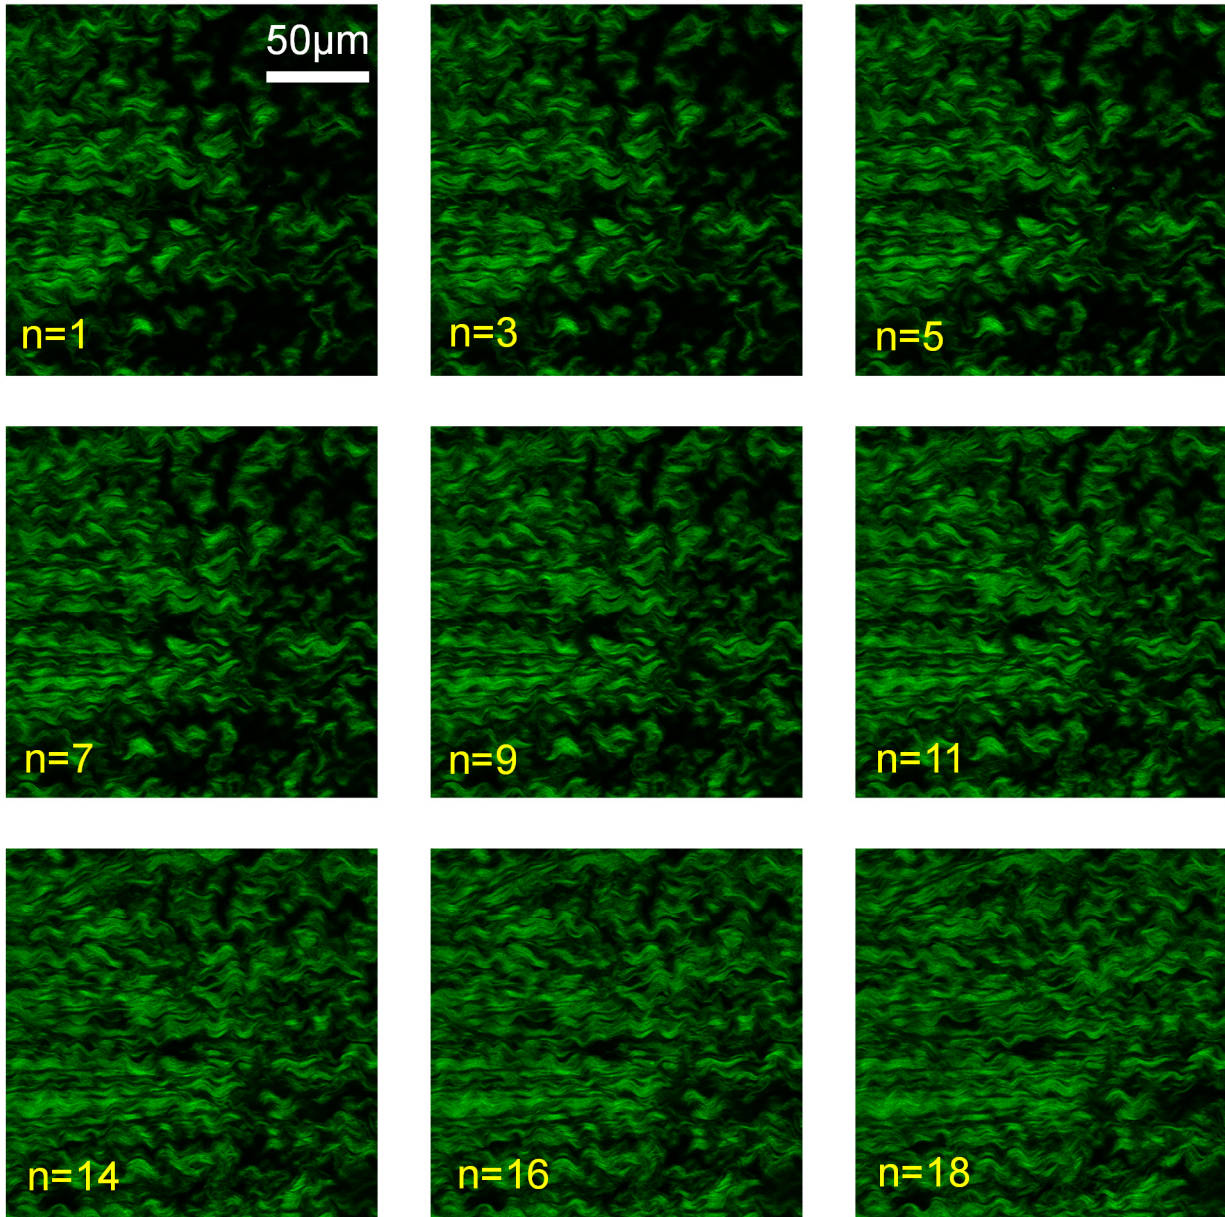

107  
108 Figure 2. Representative SHG image slices of a tissue sample. n denotes the index of each slice.

## 110 2.3 PCA-based Parameterization of GLBP stress-strain curves

111 Two distinct stress-strain curves were obtained from the equi-biaxial mechanical testing  
112 (section 2.1) of each tissue sample (Figure 3a&b), due to the anisotropic mechanical behavior of  
113 the tissue : 1) strain  $E_{11}$  and stress  $S_{11}$  along the  $X_1$ -direction, and 2) strain  $E_{22}$  and stress  $S_{22}$  along  
114 the  $X_2$ -direction. Each stress-strain curve was uniformly sampled along the stress axis within the  
115 range of 10 to 630  $KPa$ . The cutoff of 630 $KPa$  was chosen because different ranges of external  
116 stresses were applied to the tissue samples and 630 $KPa$  was the minimum peak stress value. For  
117 each tissue sample, the resampled strain values from the two curves were assembled as a vector of  
118 126 numbers,  $Y$ . By using principle component analysis (PCA) [28, 29], the vector  $Y$  of a tissue  
119 sample can be decomposed as

$$120 \quad Y \cong Y_{PCA} = \bar{Y} + \alpha_1 V_1 + \alpha_2 V_2 + \alpha_3 V_3 \quad (1)$$

121 where  $\bar{Y}$  is the population mean,  $\{V_i\}$  are the modes of variation, and  $\{\alpha_i\}$  are the coefficients.  
122 Here,  $\{\alpha_i\}$  can vary, while  $\bar{Y}$  and  $\{V_i\}$  are the same for all tissue samples. The first three modes of  
123 variation  $\{V_1, V_2, V_3\}$  with  $\{\alpha_1, \alpha_2, \alpha_3\}$  can describe 99% of the total variation of the stress-strain  
124 curves, which means each stress-strain curve can be almost perfectly reconstructed by using Eq.(1)  
125 as shown in Figure 3b. Furthermore, the reconstruction error was measured by the mean absolute  
126 error (MAE), given by

$$127 \quad MAE = \frac{1}{L_2 - L_1 + 1} \sum_{j=L_1}^{L_2} |Y_{PCA}(j) - Y(j)| \quad (2)$$

128 where  $j$  is the index of a component in a vector; and if  $L_1 = 1, L_2 = 63$ , MAE is the error of the  
129 reconstructed  $S_{11} \sim E_{11}$  curve; and if  $L_1 = 64, L_2 = 126$ , MAE is the error of the reconstructed  
130  $S_{22} \sim E_{22}$  curve.



131 As shown in Figure 3c&d, a material is softer, i.e. more compliant, than the mean material  
132 if  $\alpha_1 < 0$ , and stiffer than the mean material if  $\alpha_1 > 0$ . Thus the sign of  $\alpha_1$  can be used to describe  
133 the overall tissue stiffness.

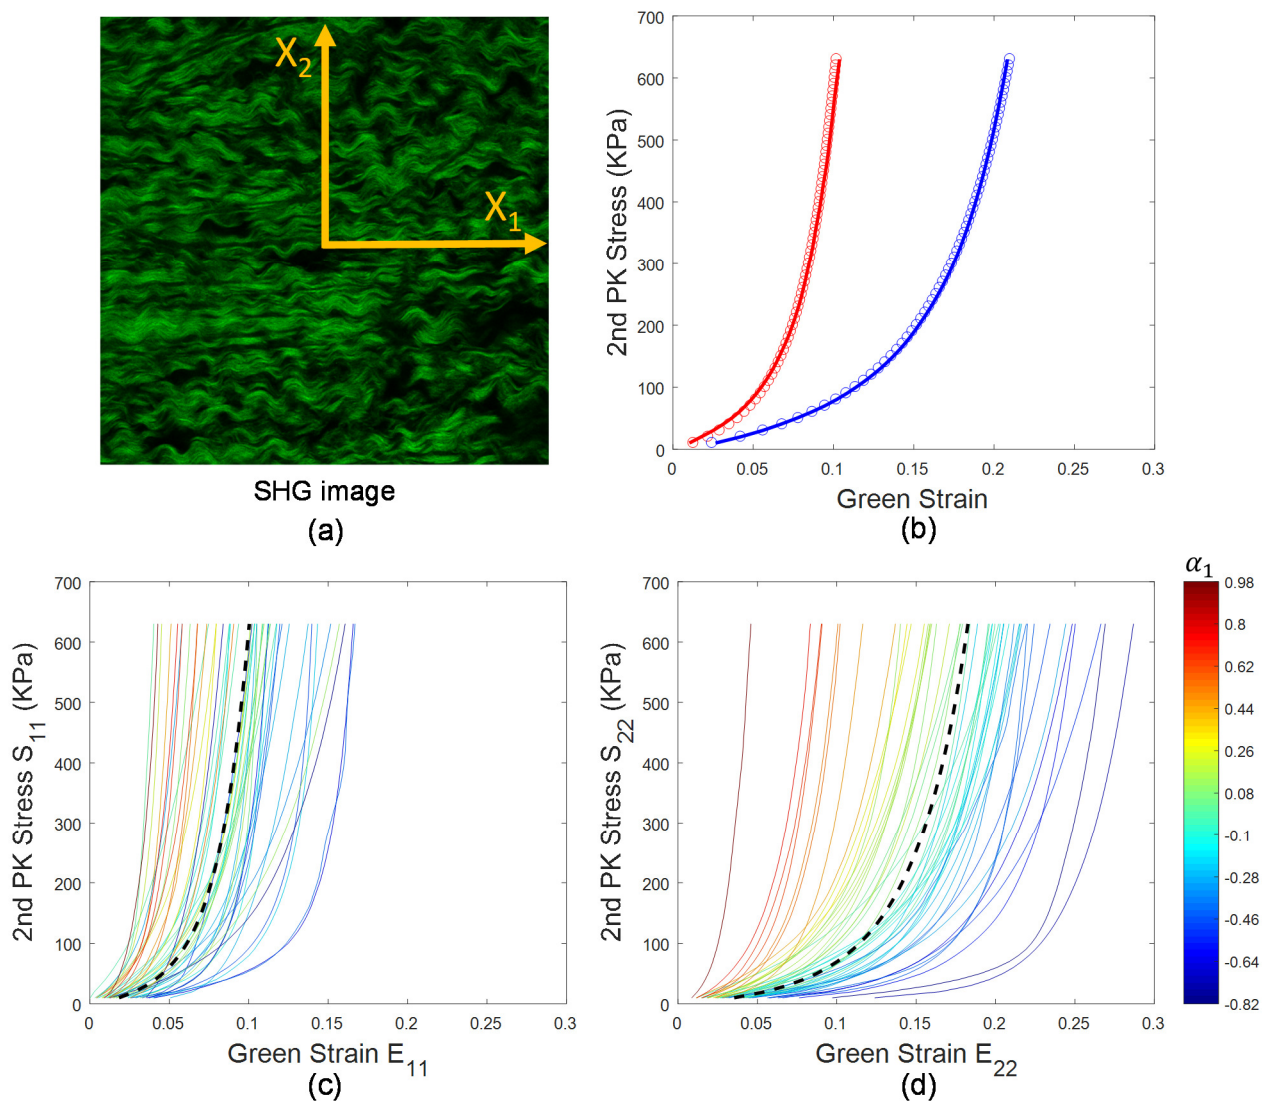

134  
135

136 Figure 3. (a) The orientation definition of a tissue sample:  $X_1$  direction and  $X_2$  direction. (b) The  
137 open circles represent the stress-strain curves of a tissue sample from equi-biaxial mechanical  
138 testing experiments. The reconstructed stress-strain curves are shown by the red lines ( $S_{11} \sim E_{11}$ )  
139 and blue lines ( $S_{22} \sim E_{22}$ ). (c)&(d) The stress-strain curves in the two directions of the 48 tissue  
140 samples color-coded by the corresponding  $\alpha_1$ . The dashed lines are the mean curves,  $\bar{Y}$ .



## 141 2.4 Deep learning model

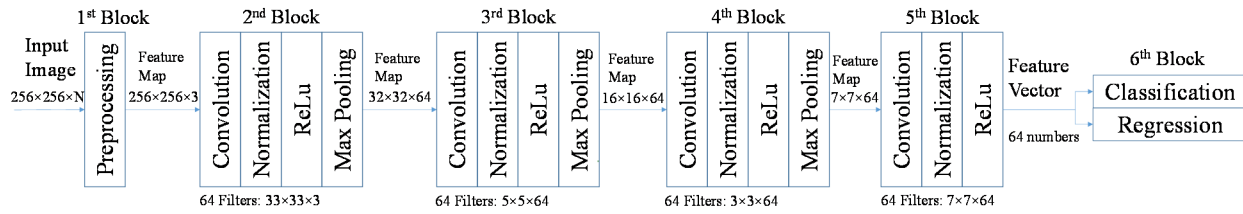

142

143 Figure 4. Architecture of the deep convolutional neural network used in this study.

144 As show in Figure 4, we designed a deep convolutional neural network (CNN) as the deep  
145 learning model, consisting of 6 blocks in a pipeline. The 1<sup>st</sup> block takes an input image of size  
146  $256 \times 256 \times N$  pixels. The 6<sup>th</sup> block can be configured either as a classifier of the overall tissue  
147 stiffness (sign of  $\alpha_1$ ), or a regressor to predict the PCA parameters  $\{\alpha_1, \alpha_2, \alpha_3\}$ , which can be used  
148 to reconstruct the stress-strain curves by Eq.(1). The CNN (Figure 4) learns the relationship  
149 between the tissue SHG images and elastic properties from the training dataset, and then can infer  
150 the elastic properties from a new tissue image.

151 Usually, convolutional neural networks (CNNs) consist of many layers that are  
152 sequentially connected, e.g., output from the first layer is the input to the second layer. A layer  
153 performs a specific operation, such as convolution, normalization, or max pooling, and it has  
154 parameters either prescribed or to be learned from data. For a detailed explanation of these layers,  
155 we refer the reader to the reference papers [17, 18, 30, 31]. The network structure should be  
156 designed for specific applications, e.g., choosing the types and sizes of layers and determining  
157 their combinations. For our application, the designed CNN consisting of 6 blocks in a pipeline,  
158 where each block has one or more layers. Given an input 3D image of  $256 \times 256 \times N$  pixels, the 1<sup>st</sup>  
159 block with only one preprocessing layer, performs local contrast normalization and uniformly  
160 resamples the input 3D image into the first feature map of  $256 \times 256 \times 3$  pixels. The 1<sup>st</sup> block does  
161 not have any trainable/free parameters. The 2<sup>nd</sup> block contains a convolution layer with 64 filters

162 (a.k.a. kernels) of  $33 \times 33 \times 3$  pixels, a batch-normalization layer, a ReLu (rectifier linear unit) layer,  
163 and a max pooling layer; and the output from the 2<sup>nd</sup> block is a feature map of  $32 \times 32 \times 64$  pixels.  
164 The 3<sup>rd</sup> to the 5<sup>th</sup> blocks are very similar to the 2<sup>nd</sup> block, which output feature maps of  $16 \times 16 \times 64$ ,  
165  $7 \times 7 \times 64$ , and  $1 \times 1 \times 64$  pixels respectively. All of the max-pooling layers use a  $2 \times 2$  pooling window.  
166 The 1<sup>st</sup> to 5<sup>th</sup> blocks can be considered image-feature extractors which output a feature vector of  
167 64 numbers. The 6<sup>th</sup> block is used for classification with a softmax classifier, and regression with  
168 a linear model. The CNN was implemented by using MatConvnet [32], an open source MATLAB  
169 toolbox, and custom MATLAB functions; and it can process an input 3D image within 10 seconds  
170 on a PC with intel i7-4770 CPU and 32G RAM.

## 171 **2.5 Learning of the deep convolutional neural network**

172 The CNN (Figure 4) parameters were learned from the training data. To overcome the  
173 challenge of training the CNN with a small dataset [28] (i.e., 48 test samples, which is an  
174 acceptable sample size for material testing of biological tissues), the CNN was trained by  
175 combining: 1) unsupervised deep learning to determine the parameters in the 2<sup>nd</sup> to 5<sup>th</sup> blocks, 2)  
176 supervised learning to determine the parameters in the 6<sup>th</sup> blocks, and 3) data augmentation to  
177 generate more training data.

### 178 **2.5.1 Unsupervised Deep Learning from the 2<sup>nd</sup> to 5<sup>th</sup> blocks**

179 To determine the filter parameters of a convolution layer, generally we could use encoder-  
180 decoder based unsupervised learning strategies [33-36]. The input feature map to the convolution  
181 layer can be divided into small patches, where each patch has the same size as a filter (all filters in  
182 the same layer have the same size). Each patch can be converted to a vector,  $X$ , and the vectorized  
183 patches can be stacked together as the columns of a data matrix  $\mathbf{X}$ . The filters of the convolution  
184 layer can also be vectorized and stacked together as the columns of a filter matrix  $\mathbf{A}$ . Let  $h(x)$

185 denote the ReLu function:  $h(x) = x$  if  $x > 0$ , and  $h(x) = 0$  if  $x \leq 0$ . The encoder performs  
186 convolution followed by ReLu to each patch, which outputs the code matrix  $h(\mathbf{A}\mathbf{X})$  close to the  
187 optimal (unknown yet) code matrix  $\mathbf{Z}$ . Given the optimal code matrix  $\mathbf{Z}$ , the decoder tries to  
188 recover the input patches  $\mathbf{X}$  by using a linear combination of the atoms/columns in a  
189 dictionary/matrix  $\mathbf{D}$ , i.e, using  $\mathbf{D}\mathbf{Z}$  to approximate  $\mathbf{X}$ . Then the goal is to find the optimal variables  
190  $\{\mathbf{A}, \mathbf{D}, \mathbf{Z}\}$  such that the encoding error and the decoding error are both minimized, which is to  
191 minimize the following objective function:

$$192 \quad \mathcal{F} = \|\mathbf{h}(\mathbf{A}'\mathbf{X}) - \mathbf{Z}\|^2 + \|\mathbf{X} - \mathbf{D}\mathbf{Z}\|^2 + g(\mathbf{A}, \mathbf{D}, \mathbf{Z}) \quad (3)$$

193 where  $g(\mathbf{A}, \mathbf{D}, \mathbf{Z})$  defines some constraints on the variables, and  $\mathbf{A}'$  denotes the matrix-transpose  
194 of  $\mathbf{A}$ . The matrix norm  $\|\cdot\|$  is the Frobenius norm. Obviously, by using different constraints, we  
195 can obtain different solutions of  $\{\mathbf{A}, \mathbf{D}, \mathbf{Z}\}$ . We proposed an algorithm with three steps to directly  
196 obtain a solution under the low rank constraint [37]:

197 Step-1: Perform low rank approximation (LRA) [37] on the patches  $\mathbf{X}$ , then a vectorized  
198 patch  $X$  can be approximated by

$$199 \quad X \cong \sum_{m=1}^M z_m d_m = \mathbf{D}\mathbf{Z}, \quad (4)$$

200 where  $\mathbf{D} = [d_1, \dots, d_M]$ , and the vector  $d_m$  has the same size as  $X$ , and  $M \leq \tilde{M}$  which is the  
201 number of pixels in the patch  $X$ .  $d_m$  is the product of the  $m^{\text{th}}$  largest singular value,  $\lambda_m$ , and the  
202 corresponding left-singular vector obtained by LRA.  $\mathbf{D}$  is the same for every single patch  $X$ . Also  
203 obtained by LRA, the code vector,  $\mathbf{Z} = [z_1, \dots, z_M]'$ , is a column vector of scalars, which is different  
204 for different patches. The percentage error of approximation for the patches  $\mathbf{X}$  is given by

$$205 \quad Error = \frac{\sum_{n=M+1}^{\tilde{M}} \lambda_n^2}{\sum_{m=1}^{\tilde{M}} \lambda_m^2} \times 100\% . \quad (5)$$

206 If  $M = \tilde{M}$ , then the error is zero. By controlling the number of retrained singular values and  
 207 singular vectors, i.e.,  $M$ , the approximation error and the computation cost (proportional to  $M$ ) can  
 208 be controlled. In this study,  $M$  is fixed to 32, and the error is less than 30%. The low rank  
 209 approximation essentially obtains  $\mathbf{D}$  and  $\mathbf{Z}$  that minimize  $\|\mathbf{X} - \mathbf{DZ}\|^2$  under the low rank  
 210 constraint. Since the singular vectors in  $\mathbf{D}$  are orthogonal to each other, the code vector  $Z$  can be  
 211 simply approximated by  $\mathbf{D}'X$ , i.e.,  $Z \cong \mathbf{D}'X$ , which is obtained by multiplying  $\mathbf{D}'$  to both sides of  
 212 Eq.(4). After this step, the code matrix  $\mathbf{Z}$  and dictionary  $\mathbf{D}$  are determined.

213 Step-2: Define the filter matrix  $\mathbf{A}$  by using the learned dictionary  $\mathbf{D}$ , given by

$$214 \quad \mathbf{A} = [\mathbf{D}, -\mathbf{D}] = [d_1, \dots, d_M, -d_1, \dots, -d_M]. \quad (6)$$

215 Also, we define a new code vector  $\tilde{Z}$  as

$$216 \quad \tilde{Z} = [h(Z'), h(-Z')]'. \quad (7)$$

217 Then the objective function Eq.(3) is equivalent to

$$218 \quad \mathcal{F} = \|h(\mathbf{A}'X) - \tilde{Z}\|^2 + \|\mathbf{X} - \mathbf{DZ}\|^2 + g(\mathbf{A}, \mathbf{D}, \mathbf{Z}), \quad (8)$$

219 where  $\tilde{Z}$  is the stack of new code vectors, corresponding to  $\mathbf{Z}$ , and  $\tilde{Z} \cong h(\mathbf{A}'X)$  because  $Z \cong \mathbf{D}'X$ .

220 Then, a vectorized patch  $X$  can be encoded as a vector  $\tilde{Z}$  by the encoder  $h(\mathbf{A}'X)$ . For example,  
 221  $X \cong 2d_1 - 3d_2$ , then the code vector is  $[2, 0]$  if  $\mathbf{A} = [d_1, d_2]$ , and the code vector is  $[2, 0, 0, 3]$  if  
 222  $\mathbf{A} = [d_1, d_2 - d_1, -d_2]$ , which clearly shows that the longer code vector preserves more  
 223 information of  $X$ . The rationale of Eq.(6)&(7) is that the ReLu layer rejects any negative signal  
 224 (i.e. code) output from the convolution layer, and therefore, nearly half of the signals will be lost  
 225 in each block, harming the performance of the CNN. After this step, the filters of the convolution  
 226 layer are determined.

227            Step-3: Perform feature map normalization. The output from the ReLu layer is a feature  
228 map serving as the input to the next layer. The size of the feature map is  $K_1 \times K_2 \times K_3$  (i.e. height  
229  $\times$  width  $\times$  channel). The values of the feature map at one spatial location can be assembled to a  
230 code vector  $Z$  of length  $K_3$ . By assembling all of the code vectors from the training dataset, a data  
231 matrix is obtained, and each row of this matrix is normalized by subtracting the mean and dividing  
232 by the standard deviation. The rows of the code matrix  $\mathbf{Z}$  from a single input image will also be  
233 normalized in the same way by using the same values of mean and standard deviation. This  
234 normalization is essentially equivalent to batch-normalization [30] which has been shown to  
235 improve CNN accuracy. After this step, the parameters (i.e. mean and standard deviation values)  
236 of the normalization layer are determined.

### 237 **2.5.2 Supervised learning in the 6<sup>th</sup> block**

238            The 6<sup>th</sup> block can be configured either as a classifier or regressor. In the classification  
239 configuration, a softmax function is used to predict class membership based on the feature vector  
240 from the 5<sup>th</sup> block. Since it is a binary (soft vs. stiff) classification task, the softmax function  
241 reduces to a logistic function, given by

$$242 \quad y = \frac{1}{1 + \exp(-\sum_{i=1}^{64} w_i x_i + b)} \quad (9)$$

243 where  $\{w_1, \dots, w_{64}, b\}$  are the unknown scalar parameters and  $[x_1, \dots, x_{64}]$  is the feature vector  
244 from the 5<sup>th</sup> block. Usually, a discrimination threshold (e.g. 0.5) is specified for the binary  
245 classification. If  $y$  is greater than or equal to the threshold, then the input is classified as stiff; and  
246 if  $y$  is smaller than the threshold, then it is classified as soft. With the labeled training data (i.e.,  
247 image data with known mechanical properties), the 65 parameters in Eq.(9) can be determined  
248 through supervised learning using the cross-entropy loss function and the conjugate gradient  
249 optimization algorithm.

250 In the regression configuration, a multiple output linear regressor predicts the values of  
251  $\{\alpha_1, \alpha_2, \alpha_3\}$  in Eq.(1) based on the feature vector from the 5<sup>th</sup> block, which is given by

252 
$$\alpha_i = \sum_{j=1}^{64} w_{ij}x_j + b_i, i=1, 2, 3 \quad (10)$$

253 where  $\{w_{ij}, b_i, i = 1,2,3, j = 1, \dots, 64\}$  are the unknown scalar parameters. With the labeled  
254 training data, the 195 parameters of this regressor can be learned by using the least squares  
255 regression algorithm. Once the parameters  $\{\alpha_1, \alpha_2, \alpha_3\}$  are predicted by the regressor, the stress-  
256 strain curves can be reconstructed by using Eq.(1).

### 257 2.5.3 Data augmentation

258 Data augmentation methods are extensively used in Deep Learning applications [18, 38-  
259 40] to generate more training data. In this study, two data augmentation methods were used: image  
260 splitting and flipping (Figure 5). A 3D image of  $N$  slices can be split into patches using a sliding  
261 window with a stride of 128, and the size of each patch is  $256 \times 256 \times N$ . As a result of image  
262 splitting, 1678 patches were generated. Furthermore, each patch was flipped along the horizontal  
263 direction and/or vertical direction, which produced 6712 patches. The elastic properties  
264 corresponding to image patches from the same GLBP tissue sample, were assumed to be identical.

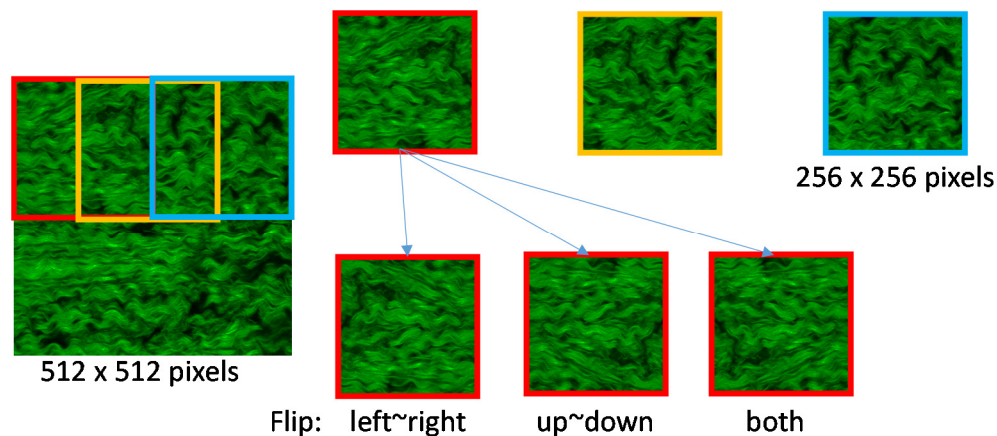

265

266

Figure.5 An example of data augmentation to generate image patches.



## 267 **2.6 A comparative study of network structures**

268           Given the relatively large size of the CNN compared to the dataset, the natural question  
269 arises whether reducing the number of layers or filters will significantly impact the performance.  
270 Given the huge design space, it would be impractical to evaluate all possible simplifications of the  
271 CNN structure. In this study, we chose to investigate two simplified CNNs for comparison, named  
272 CNN-s1 and CNN-s2 respectively. CNN-s1: in *Step-2* of unsupervised learning in section 4.5.1,  
273 the filter matrix  $\mathbf{A}$  was simplified as  $\mathbf{A} = \mathbf{D}$ , which reduces the number of filters. CNN-s2: the  
274 ReLu and normalization layers were removed, and the filter matrix  $\mathbf{A}$  was simplified as  $\mathbf{A} = \mathbf{D}$ .  
275 The structure of CNN-s2 is similar to that in [34].

## 276 **3. RESULTS**

### 277 **3.1 Unsupervised deep learning**

278           The learned filters of the CNN are visualized in Figure 6. The filters in the 2<sup>nd</sup> block (Fig.  
279 6a) are local image feature detectors, resembling the local fiber network structures. The filters in  
280 the other blocks (Fig. 6b-d) are more abstract, essentially representing various combinations of the  
281 local structures at different length scales and locations.

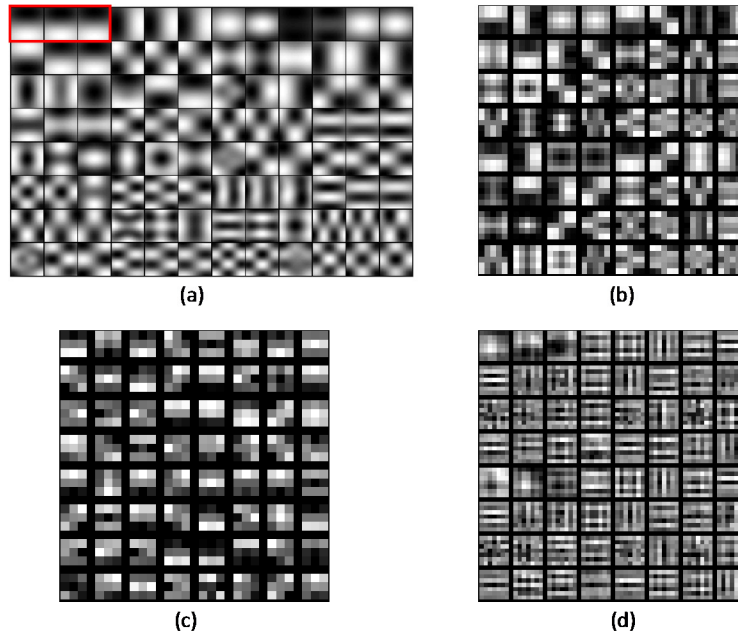

282

283 Figure 6. Examples of the learned filters. (a) The 32 filters in the convolution layer of the 2<sup>nd</sup> block,  
284 the 32 opposites of these filters are not shown. The red box contains one filter (size is 33×33×3).  
285 (b) One of the filters in the convolution layer of the 3<sup>rd</sup> block. (c) One of the filters in the  
286 convolution layer of the 4<sup>th</sup> block. (d) One of the filters in the convolution layer of the 5<sup>th</sup> block.

287

### 288 3.2 Classification

289 Classification performance was evaluated through ten-fold cross validation using the image  
290 patch data. In each round of cross validation, 90% of the image patches and corresponding overall  
291 stiffness values (i.e. sign of  $\alpha_1$ ) were randomly selected as the training data; and the remaining  
292 10% of the data were used as the testing data to test whether the trained classifier can predict the  
293 sign of  $\alpha_1$ , i.e., identify whether the tissue sample (corresponding to an image patch) is soft or  
294 stiff. The classification accuracy, defined as  $(TP+TN)/(TP+TN+FP+FN)$ , the sensitivity, defined  
295 as  $TP/(TP+FN)$ , and the specificity defined as  $TN/(TN+FP)$ , were calculated to assess  
296 performance. Here, true positive (TP) is the number of stiff tissue patches correctly identified as  
297 stiff; false negative (FN) is the number of stiff tissue patches incorrectly identified as soft; true

298 negative (TN) is the number of soft tissue patches correctly identified as soft; and false positive  
299 (FP) is the number of soft tissue patches incorrectly identified as stiff. In addition, AUC, defined  
300 as the area under a receiver operating characteristic (ROC) curve, was calculated as a measure of  
301 the overall classification performance. For comparison, a baseline softmax classifier using the  
302 skewness of image histogram [41] as the only feature, was also trained and tested. Since the two  
303 histograms of an image and its flipped version are the same, the flipped image patches were not  
304 used in the classification experiment. Two simplified versions of the CNN, CNN-s1 and CNN-s2  
305 with less filters and less layers (details in Method section), were also tested.

306 ROC curves, as shown in Figure 7, were obtained by varying the discrimination threshold  
307 for each classifier. The performances of the proposed CNN, CNN-s1, CNN-s2, and the skewness-  
308 based softmax classifier using 0.5 as the discrimination threshold for classification, are reported in  
309 Table-1. The proposed CNN achieved the best performance, the skewness-based softmax classifier  
310 had the worst performance, and the two simplified CNNs had moderate performance.

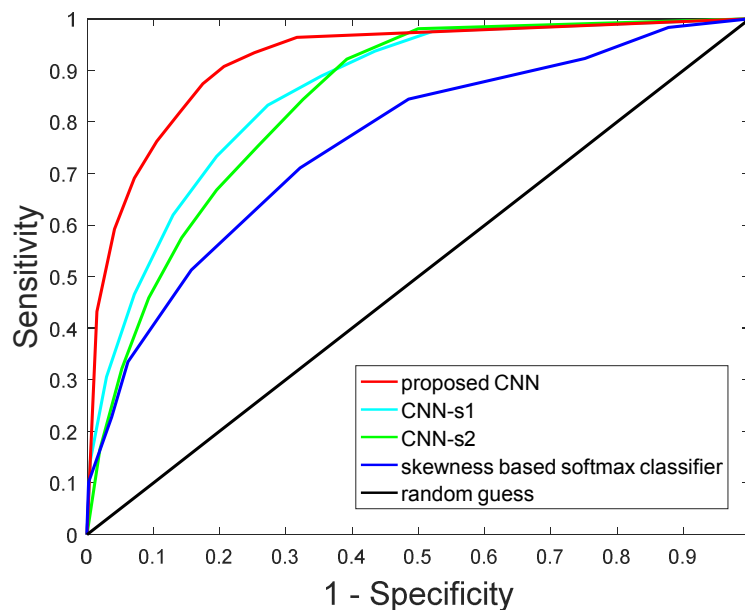

311

312

Figure 7. ROC curves of different classifiers

313

314

Table-1: Classification Performance

| Method                            | Accuracy | Sensitivity | Specificity | AUC  |
|-----------------------------------|----------|-------------|-------------|------|
| proposed CNN                      | 84±2.5%  | 82±4.1%     | 86±3.6%     | 0.92 |
| CNN-s1                            | 78±2.8%  | 73±5.5%     | 80±3.7%     | 0.86 |
| CNN-s2                            | 75±3.5%  | 67±5.6%     | 80±4.9%     | 0.84 |
| skewness based softmax classifier | 71±3.2%  | 51±5.9%     | 84±3.9%     | 0.76 |

315

### 316 3.3 Regression

317 Regression performance was evaluated using a leave-one-out cross validation approach to  
318 test whether the trained regressor can predict the values of  $\{\alpha_1, \alpha_2, \alpha_3\}$ , which were used to  
319 reconstruct the stress-strain curve of each tissue sample by Eq.(1). In each round of the cross  
320 validation, the image patches and the stress-strain curves from one of the 48 tissue samples were  
321 used as the testing data to evaluate the accuracy of the regressor, and the remaining data were used  
322 as the training data to determine the parameters of the regressor. The predicted  $\{\alpha_1, \alpha_2, \alpha_3\}$  values  
323 for each of the image patches from the test tissue sample were averaged to obtain the final  
324  $\{\alpha_1, \alpha_2, \alpha_3\}$  predictions for the whole tissue sample.

325 From the cross validation, the errors (Eq.(2)) in the predicted stress-strain curves were  
326  $0.021 \pm 0.015$  and  $0.031 \pm 0.029$ , compared to the actual  $S_{11} \sim E_{11}$  and  $S_{22} \sim E_{22}$  curves, respectively.  
327 Figure 8a shows an exemplary set of experimentally measured and predicted curves for one  
328 sample, and the error distribution across all of the samples is given in Figure 8b. The full set of  
329 predicted curves for all 48 samples are provided in the appendix.

330

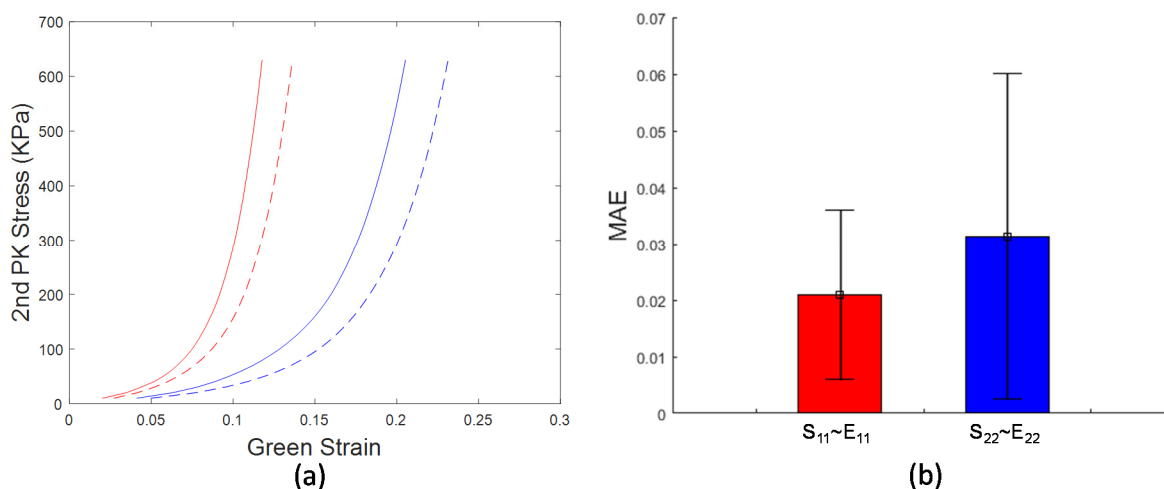

331

332 Figure 8. (a) Representative stress-strain curves predicted by the deep learning model shown as  
333 dashed lines, and the stress-strain curves obtained from mechanical testing shown as solid lines.  
334  $S_{11} \sim E_{11}$  curves are shown in red.  $S_{22} \sim E_{22}$  curves are shown in blue. (b) The mean absolute error  
335 (MAE) distribution of all samples.

336

## 337 4. DISCUSSION

338 In this study, we developed a Deep Learning approach utilizing a deep CNN to estimate  
339 the elastic properties of collagenous tissues directly from noninvasive microscopy images. To our  
340 best knowledge, this is the first study in which Deep Learning techniques were used to derive  
341 nonlinear anisotropic elastic properties directly from tissue microscopy images. This work was  
342 motivated by the lengthy, complex, and destructive nature of traditional tissue mechanical testing.  
343 While it takes only about 10-30 minutes to obtain SHG images of a tissue sample, it takes much  
344 longer (hours) to prepare testing samples, set up testing and measurement instruments, and perform  
345 the actual mechanical test on each sample to obtain the stress-strain response curves. It took several  
346 months to obtain the data from the 48 samples used in this study. The success of this study holds

347 promise for the use of Machine Learning techniques to noninvasively and efficiently estimate the  
348 mechanical properties of many structure-based biological materials.

349 Traditional machine learning methods [17] require hand-engineered features (i.e. features  
350 defined by human experts), which are difficult to obtain for this application. Rezakhaniha *et al.*  
351 [44] have defined intuitive texture features of tissue fibers, such as waviness, straightness, bundle  
352 size, etc., but this requires time-consuming manual annotation. Moreover, it is unclear whether  
353 these hand-engineered features could fully describe the fiber network structural information. As  
354 an end-to-end solution, CNN eliminates the need for hand-engineered features. One factor limiting  
355 the use of CNN and Deep Learning methods in biomechanics applications, is that they generally  
356 require a large amount of training data [42, 43], while the sample size for mechanical testing of  
357 biological tissues is typically small, on the order of 10 – 100 samples. However, in this study, it is  
358 shown that the deep CNN can also work well with a small dataset by combining supervised and  
359 unsupervised learning methods, and utilizing data augmentation methods. As more images and  
360 mechanical testing data are collected, the performance of the CNN can be further improved.

361 The CNN architecture used in this study, was specifically designed for this application.  
362 The 1<sup>st</sup> to 5<sup>th</sup> block of the CNN serve as automatic feature extractors that convert the input image  
363 into a feature vector for classification and regression. The filters in the first convolution layer  
364 represent different local fiber network patterns, while the filters in the remaining convolution  
365 layers represent various combinations of these patterns at different locations and length scales.  
366 Two simplified versions of the CNN were tested, i.e., CNN-s1 and CNN-s2 with less filters and  
367 less layers. The results show that simplifications to the CNN led to a significant decrease of  
368 accuracy, which may be the result of signal loss during signal propagation due to the fewer filters,  
369 and disruption of the encoding mechanism due to the fewer layers, respectively.



370           The CNN also demonstrated superiority over a simple image-feature based method to  
371 estimate the overall stiffness of collagen-based materials. Raub *et al.* [41] showed that the  
372 skewness of an image histogram was correlated to the collagen concentration and the Young's  
373 modulus of collagen gels. Therefore, a softmax classifier was built by using the skewness as the  
374 only input feature in this study. As demonstrated in the results (Figure 7), the CNN outperformed  
375 the softmax classifier by a large margin; and even the two simplified versions of the CNN  
376 performed better than the softmax classifier, which underscores the superiority of CNNs for  
377 automatically extracting fiber network features.

378           More importantly, we demonstrated that the CNN can predict the PCA parameters of the  
379 stress-strain curves, such that the entire anisotropic stress-strain response of GLBP tissues can be  
380 estimated. For a nonlinear elastic response, it is well known that the Young's modulus or stiffness  
381 cannot fully describe the tissue mechanical behavior, since the tangential value changes at different  
382 stress/strain levels along the nonlinear stress-strain curve. Thus, the PCA parameters offer a much  
383 more comprehensive look at the tissue elastic properties. Interestingly, we found that for this  
384 application, the overall "shape" of a stress-strain curve can be described with a single parameter,  
385  $\alpha_1$  in Eq.(1). The novel PCA based approach to represent stress-strain curves developed in this  
386 study may facilitate more thorough analysis and comparison of tissue stress-strain responses over  
387 basic stiffness metrics.

388           This approach opens the door for the fast and noninvasive assessment of collagenous tissue  
389 elastic properties from microstructural images, enabling many potential applications such as  
390 serving as a quality control tool for the manufacturing of BHVs.

391

## 392 **5. CONCLUSION**

393 In conclusion, this study demonstrated the feasibility of using Deep Learning techniques  
394 for fast and noninvasive assessment of collagenous tissue elastic properties from microcopy  
395 images. The main contributions of this study include: 1) the use of PCA to parameterize equi-  
396 biaxial stress-strain curves and quantify the overall stiffness, 2) the custom deep convolutional  
397 neural network design to automatically extract structural patterns of collagenous tissues, and  
398 perform classification to identify overall stiffness, as well as regression to predict PCA- parameters  
399 of nonlinear anisotropic stress-strain curves, and 3) the unsupervised deep learning method  
400 combined with supervised learning and data augmentation to overcome the challenge of small  
401 datasets for Deep Learning in the field of biomechanics. The developed approach was evaluated  
402 through cross validation, where an average classification accuracy of 84% and average regression  
403 errors of 0.021 and 0.031 were achieved. This study clearly demonstrates the great potential for  
404 Machine Learning techniques to estimate tissue mechanical properties solely through the use of  
405 noninvasive microcopy images.

## 406 **ACKNOWLEDGEMENTS**

407 Research for this project is funded in part by NIH grant R01 HL104080. Liang Liang is supported  
408 by an American Heart Association Post-doctoral fellowship 16POST30210003. The authors thank  
409 Fatiesa Sulejmani and Andres Caballero for assisting in the collection of biaxial testing data and  
410 SHG images used in this study, as well as Caitlin Martin for comments and suggestions.

## 411 **CONFLICT OF INTEREST STATEMENT**

412 None.

413

## Appendix

414 Predicted stress-strain curves of the 48 tissue samples are shown from the best to the worst.  
415 Horizontal axis shows Green Strain. Vertical axis shows 2<sup>nd</sup> PK stress ( $KPa$ ). Dashed lines are  
416 predicted stress-strain curves, and solid lines are the curves from mechanical testing.

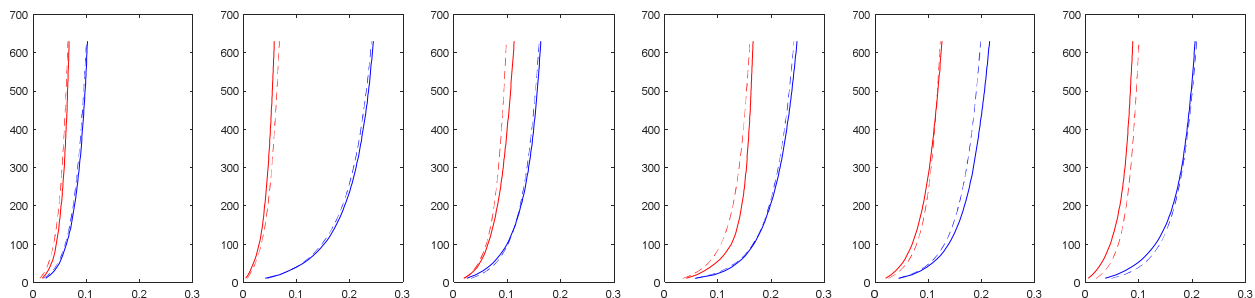

417

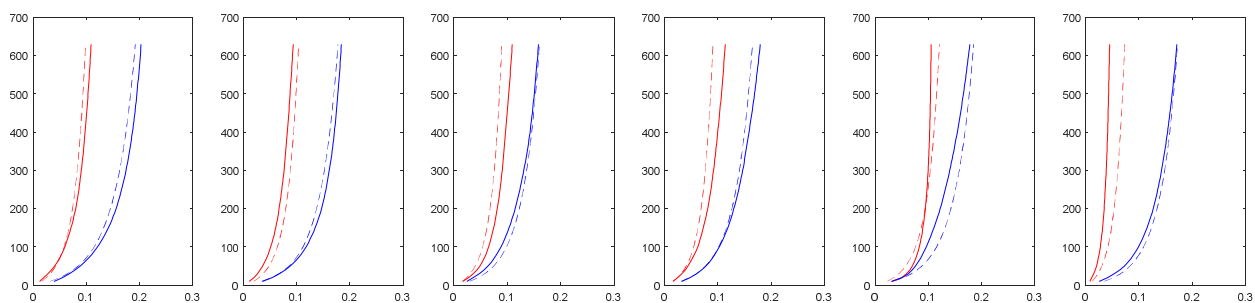

418

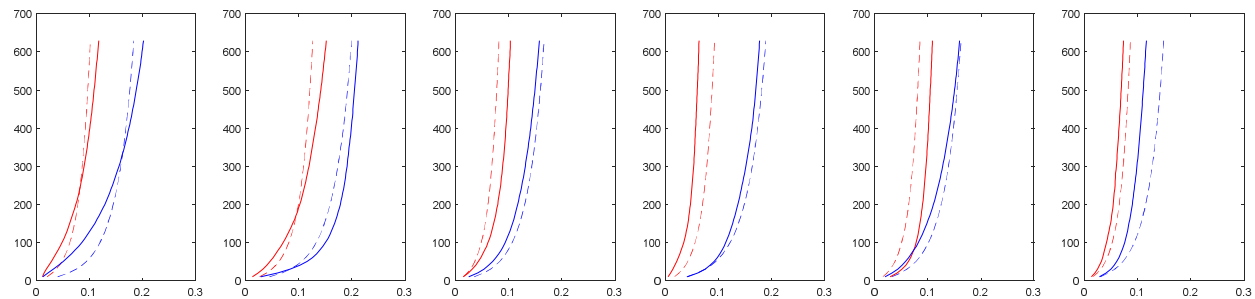

419

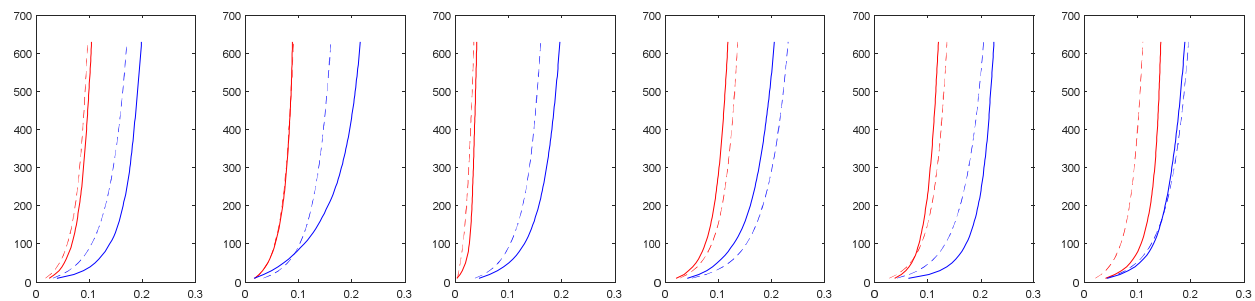

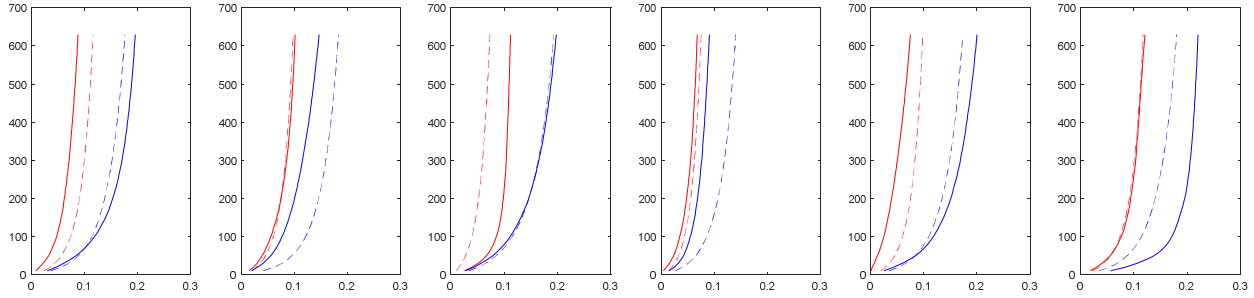

420

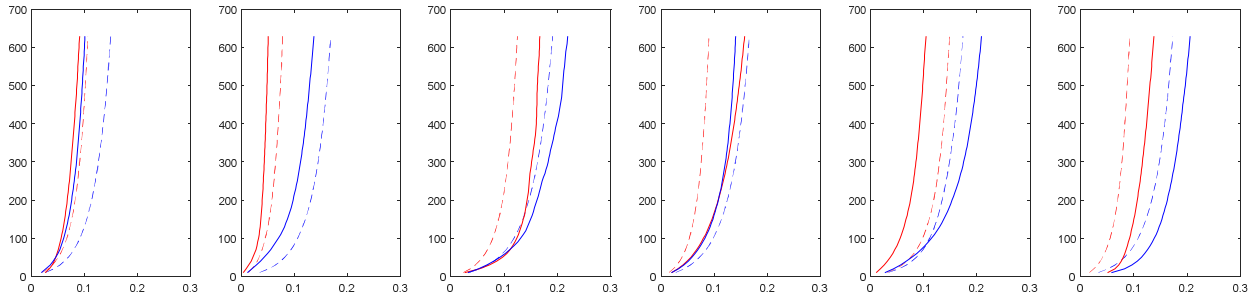

421

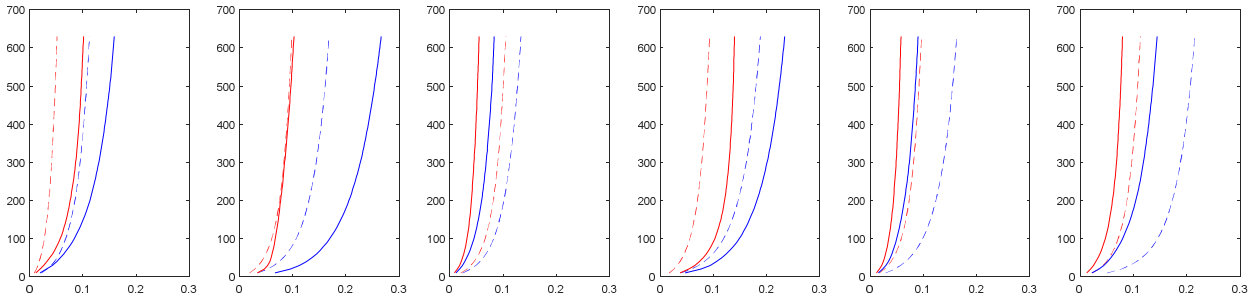

422

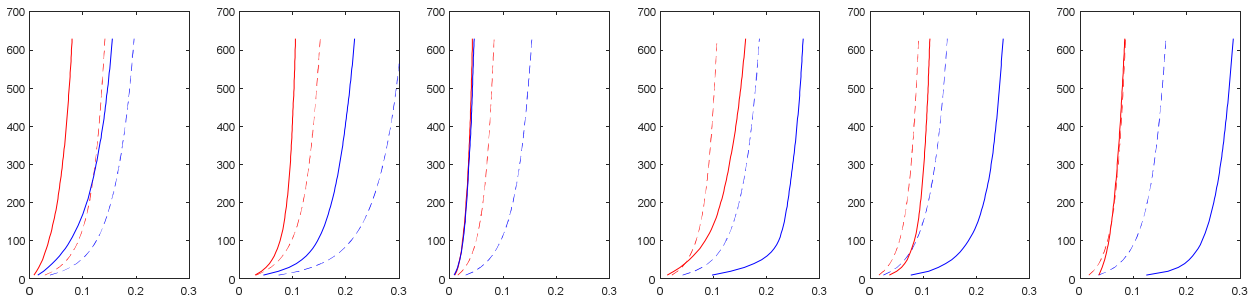

423

424

## 425 REFERENCES

- 426 [1] Fomovsky GM, Thomopoulos S, Holmes JW. Contribution of Extracellular Matrix to the Mechanical  
427 Properties of the Heart. *Journal of molecular and cellular cardiology* 2010;48:490-6.
- 428 [2] Sacks MS. Incorporation of Experimentally-Derived Fiber Orientation into a Structural Constitutive  
429 Model for Planar Collagenous Tissues. *Journal of Biomechanical Engineering* 2003;125:280-7.
- 430 [3] Nimni ME, Cheung D, Strates B, Kodama M, Sheikh K. Chemically modified collagen: A natural  
431 biomaterial for tissue replacement. *Journal of Biomedical Materials Research* 1987;21:741-71.
- 432 [4] Khor E. Methods for the treatment of collagenous tissues for bioprotheses. *Biomaterials*  
433 1997;18:95-105.
- 434 [5] Vesely I. The evolution of bioprosthetic heart valve design and its impact on durability.  
435 *Cardiovascular Pathology* 2003;12:277-86.
- 436 [6] Lam MT, Wu JC. Biomaterial applications in cardiovascular tissue repair and regeneration. *Expert*  
437 *review of cardiovascular therapy* 2012;10:1039-49.
- 438 [7] Brown P. Abdominal Wall Reconstruction Using Biological Tissue Grafts. *AORN Journal* 2009;90:513-  
439 24.
- 440 [8] Demange MK, de Almeida AM, Rodeo SA. Updates in biological therapies for knee injuries: tendons.  
441 *Current Reviews in Musculoskeletal Medicine* 2014;7:239-46.
- 442 [9] Huerta S, Varshney A, Patel PM, Mayo HG, Livingston EH. Biological mesh implants for abdominal  
443 hernia repair: Us food and drug administration approval process and systematic review of its efficacy.  
444 *JAMA Surgery* 2016;151:374-81.
- 445 [10] Zhang L, Lake SP, Lai VK, Picu CR, Barocas VH, Shephard MS. A coupled fiber-matrix model  
446 demonstrates highly inhomogeneous microstructural interactions in soft tissues under tensile load.  
447 *Journal of biomechanical engineering* 2013;135:011008-.
- 448 [11] Jin T, Stanciulescu I. Computational modeling of the arterial wall based on layer-specific histological  
449 data. *Biomech Model Mechanobiol* 2016;15:1479-94.
- 450 [12] Jin T, Stanciulescu I. Numerical simulation of fibrous biomaterials with randomly distributed fiber  
451 network structure. *Biomech Model Mechanobiol* 2016;15:817-30.
- 452 [13] D'Amore A, Amoroso N, Gottardi R, Hobson C, Carruthers C, Watkins S, et al. From single fiber to  
453 macro-level mechanics: A structural finite-element model for elastomeric fibrous biomaterials. *Journal*  
454 *of the Mechanical Behavior of Biomedical Materials* 2014;39:146-61.
- 455 [14] Picu RC. Mechanics of random fiber networks-a review. *Soft Matter* 2011;7:6768-85.
- 456 [15] Liu Q, Lu Z, Hu Z, Li J. Finite element analysis on tensile behaviour of 3D random fibrous materials:  
457 Model description and meso-level approach. *Materials Science and Engineering: A* 2013;587:36-45.
- 458 [16] Wicker BK, Hutchens HP, Wu Q, Yeh AT, Humphrey JD. Normal basilar artery structure and biaxial  
459 mechanical behaviour. *Comput Methods Biomech Biomed Engin* 2008;11:539-51.
- 460 [17] LeCun Y, Bengio Y, Hinton GE. Deep Learning. *Nature* 2015;521:436-44.
- 461 [18] Krizhevsky A, Sutskever I, Hinton GE. ImageNet Classification with Deep Convolutional Neural  
462 Networks. *Neural Information Processing Systems* 2012.
- 463 [19] LeCun Y, Bottou L, Bengio Y, Haffner P. Gradient-based learning applied to document recognition.  
464 *Proceedings of the IEEE* 1998;86:2278-324.
- 465 [20] He K, Zhang X, Ren S, Sun J. Delving Deep into Rectifiers: Surpassing Human-Level Performance on  
466 ImageNet Classification. *IEEE International Conference on Computer Vision* 2015.
- 467 [21] Kokkinos I. Pushing the Boundaries of Boundary Detection using Deep Learning. *Intl Conf on*  
468 *Learning Representations* 2016.
- 469 [22] Taigman Y, Yang M, Ranzato MA, Wolf L. DeepFace: Closing the Gap to Human-Level Performance in  
470 Face Verification. *IEEE Conference on Computer Vision and Pattern Recognition* 2014.

- 471 [23] He K, Zhang X, Ren S, Sun J. Deep Residual Learning for Image Recognition. IEEE Conference on  
472 Computer Vision and Pattern Recognition 2016.
- 473 [24] Caballero A, Sulejmani F, Martin C, Pham T, Sun W. Evaluation of Transcatheter Heart Valve  
474 Biomaterials: Biomechanical Characterization of Bovine and Porcine Pericardium. Journal of Materials  
475 Science: Materials in Medicine (under review) 2017.
- 476 [25] Sacks MS, Sun W. Multiaxial Mechanical Behavior of Biological Materials. Annual Review of  
477 Biomedical Engineering 2003;5:251-84.
- 478 [26] Sun W, Sacks M, Fulchiero G, Lovekamp J, Vyavahare N, Scott M. Response of heterograft heart  
479 valve biomaterials to moderate cyclic loading. Journal of Biomedical Materials Research Part A  
480 2004;69A:658-69.
- 481 [27] Sun W, Abad A, Sacks MS. Simulated Bioprosthetic Heart Valve Deformation under Quasi-Static  
482 Loading. Journal of Biomechanical Engineering 2005;127:905-14.
- 483 [28] Devijver PA. Pattern Recognition: A Statistical Approach. London, GB: Prentice-Hall; 1982.
- 484 [29] Heimann T, Meinzer H-P. Statistical shape models for 3D medical image segmentation: a review.  
485 Medical Image Analysis 2009;13:543-63.
- 486 [30] Ioffe S, Szegedy C. Batch Normalization: Accelerating Deep Network Training by Reducing Internal  
487 Covariate Shift. Proceedings of The 32nd International Conference on Machine Learning 2015:448-56.
- 488 [31] Glorot X, Bordes A, Bengio Y. Deep Sparse Rectifier Neural Networks. Proceedings of the Fourteenth  
489 International Conference on Artificial Intelligence and Statistics 2011.
- 490 [32] Vedaldi A, Lenc K. MatConvNet: Convolutional Neural Networks for MATLAB. Proceedings of the  
491 23rd ACM international conference on Multimedia. Brisbane, Australia: ACM; 2015. p. 689-92.
- 492 [33] Jarrett K, Kavukcuoglu K, Ranzato MA, LeCun Y. What is the Best Multi-Stage Architecture for Object  
493 Recognition? International Conference on Computer Vision 2009.
- 494 [34] Lei Z, Yi D, Li SZ. Learning Stacked Image Descriptor for Face Recognition. IEEE Transactions on  
495 Circuits and Systems for Video Technology 2016;26:1685-96.
- 496 [35] Bengio Y, Lamblin P, Popovici D, Larochelle H. Greedy layer-wise training of deep networks.  
497 Proceedings of the 19th International Conference on Neural Information Processing Systems. Canada:  
498 MIT Press; 2006. p. 153-60.
- 499 [36] Hinton GE, Osindero S, Teh Y-W. A Fast Learning Algorithm for Deep Belief Nets. Neural  
500 Computation 2006;18:1527-54.
- 501 [37] Markovsky I. Structured low-rank approximation and its applications. Automatica 2008;44:891-909.
- 502 [38] Kooi T, Litjens G, van Ginneken B, Gubern-Mérida A, Sánchez CI, Mann R, et al. Large scale deep  
503 learning for computer aided detection of mammographic lesions. Medical Image Analysis 2017;35:303-  
504 12.
- 505 [39] Isensee F, Kickingereder P, Bonekamp D, Bendszus M, Wick W, Schlemmer H-P, et al. Brain Tumor  
506 Segmentation Using Large Receptive Field Deep Convolutional Neural Networks. In: Maier-Hein gFKH,  
507 Deserno gLTM, Handels H, Tolxdorff T, editors. Bildverarbeitung für die Medizin 2017: Algorithmen -  
508 Systeme - Anwendungen Proceedings des Workshops vom 12 bis 14 März 2017 in Heidelberg. Berlin,  
509 Heidelberg: Springer Berlin Heidelberg; 2017. p. 86-91.
- 510 [40] Liu S, Zheng H, Fengc Y, Lid W. Prostate Cancer Diagnosis using Deep Learning with 3D  
511 Multiparametric MRI. SPIE Medical Imaging International Society for Optics and Photonics.
- 512 [41] Raub CB, Putnam AJ, Tromberg BJ, George SC. Predicting bulk mechanical properties of cellularized  
513 collagen gels using multiphoton microscopy. Acta Biomaterialia 2010;6:4657-65.
- 514 [42] Deng J, Dong W, Socher R, Li LJ, Kai L, Li F-F. ImageNet: A large-scale hierarchical image database.  
515 2009 IEEE Conference on Computer Vision and Pattern Recognition 2009. p. 248-55.
- 516 [43] Russakovsky O, Deng J, Su H, Krause J, Satheesh S, Ma S, et al. ImageNet Large Scale Visual  
517 Recognition Challenge. International Journal of Computer Vision 2015;115:211-52.



518 [44] Rezakhaniha R, Agianniotis A, Schrauwen JTC, Griffa A, Sage D, Bouten CVC, et al. Experimental  
519 investigation of collagen waviness and orientation in the arterial adventitia using confocal laser scanning  
520 microscopy. *Biomech Model Mechanobiol* 2012;11:461-73.  
521 [45] Cootes TF, Taylor CJ, Cooper DH, Graham J. Active shape models - their training and application.  
522 *Computer Vision and Image Understanding* 1995;61:38-59.

523
